# Supplementary material for: Design and Characterization of Ethosomes for Transdermal Delivery of Caffeic Acid
Source: PubMed Central journal article supplement (PMC7465088; doi:10.3390/pharmaceutics12080740), 2020-08-06
Supplement: pharmaceutics-12-00740-s001.pdf [file pharmaceutics-12-00740-s001.pdf]

# Supplementary Materials: Design and Characterization of Ethosomes for Transdermal Delivery of Caffeic Acid

Supandeep Singh Hallan, Maddalena Sguizzato, Paolo Mariani, Rita Cortesi, Nicolas Huang, Fanny Simelière, Nicola Marchetti, Markus Drechsler, Tautgirdas Ruzgas and Elisabetta Esposito

**Table S1.** Kinetic modelling of stability profile of CA aqueous solution stored for 30 days at different temperatures.

| Kinetic Parameters | 4 °C                             | 22 °C                            | 40 °C                            |
|--------------------|----------------------------------|----------------------------------|----------------------------------|
|                    | <i>R</i> <sup>2</sup> / <i>K</i> | <i>R</i> <sup>2</sup> / <i>K</i> | <i>R</i> <sup>2</sup> / <i>K</i> |
| Zero order         | 0.991/3.442                      | 0.968/3.256                      | 0.986/3.382                      |
| First order        | 0.760/0.197                      | 0.716/0.207                      | 0.869/0.142                      |

data are the mean of 3 independent experiments, S.D. were within ± 5%

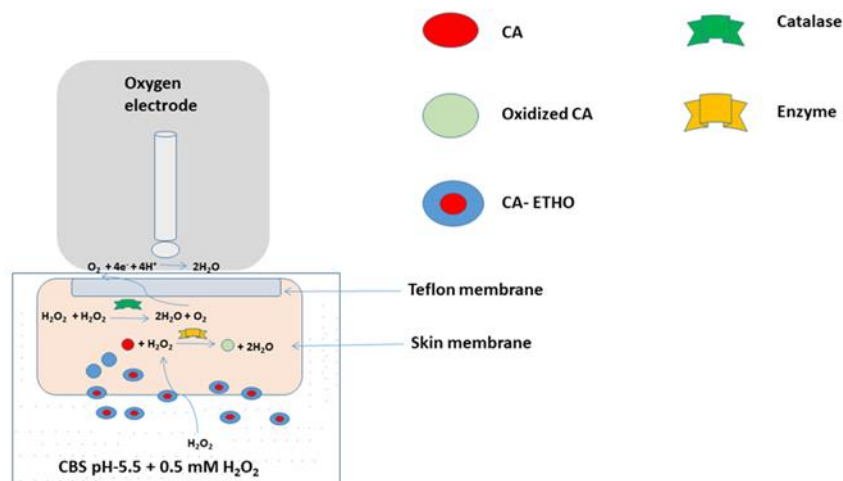

**Figure S1.** Schematic representation of mechanism of skin covered oxygen electrode. The equations 4 and 5 in the main text are illustrated here by reactions involving catalase and enzyme (with peroxidase like activity). Oxygen electrode current is proportional to O<sub>2</sub> concentration in skin, which is modulated by the extent of both mentioned reactions, since they compete for H<sub>2</sub>O<sub>2</sub> as a common substrate. Catalase reaction produce O<sub>2</sub> from H<sub>2</sub>O<sub>2</sub> (increases SCOE current), while peroxidase like activity in skin generates water from H<sub>2</sub>O<sub>2</sub> (decreases SCOE current). Analyzing current responses to polyphenols in the presence of H<sub>2</sub>O<sub>2</sub> allows to assess apparent kinetics of transdermal/topical delivery of antioxidant property of the polyphenol into skin.
